# Supplementary material for: Evaluation of the Sustainable Forest Management Performance in Forestry Enterprises Based on a Hybrid Multi-Criteria Decision-Making Model: A Case Study in China
Source: MDPI journal article supplement (doi:10.3390/f14112267), 2023-11-18
Supplement: s1 [file s1]

Archive with 1 entries (1 files):
- forests-2663861-supplementary.pdf
